# Supplementary material for: Organic Black Beans (Phaseolus vulgaris L.) from Rio de Janeiro State, Brazil, Present More Phenolic Compounds and Better Nutritional Profile Than Nonorganic
Source: MDPI journal article supplement (doi:10.3390/foods10040900), 2021-04-19
Supplement: s1 [file s1]

**Table S1.** List of pesticides analyzed by LC-MS-MS and their respective chemical classes <sup>1</sup>

| Chemical Class              | Pesticide                                                                                                                                                                                                                                                                                                                                                                                                                                                                                                                                                                                       |
|-----------------------------|-------------------------------------------------------------------------------------------------------------------------------------------------------------------------------------------------------------------------------------------------------------------------------------------------------------------------------------------------------------------------------------------------------------------------------------------------------------------------------------------------------------------------------------------------------------------------------------------------|
| Acetamide                   | cymoxanil                                                                                                                                                                                                                                                                                                                                                                                                                                                                                                                                                                                       |
| Aliphatic unsaturated ester | methoprene                                                                                                                                                                                                                                                                                                                                                                                                                                                                                                                                                                                      |
| Amide                       | dichlofluanid, DMSA, DMST, isocarbamide, tolylfluanid                                                                                                                                                                                                                                                                                                                                                                                                                                                                                                                                           |
| Anilide                     | carboxin, fenhexamid, methfuroxam, monalide, oxycarboxin, propanil                                                                                                                                                                                                                                                                                                                                                                                                                                                                                                                              |
| Azoles                      | amicarbazone, azaconazol, bitertanol, bromuconazole, carfentrazone-ethyl, clothianidin, cyazofamid, cyproconazole, diniconazole, difenoconazole, epoxiconazole, ethiprole, etoxazole, fenbuconazole, fenpyroximate, fipronil, flusilazole, flutriafol, fluquinconazole, fluxapyroxad, hexaconazole, imazalil, imazaquin, imibenconazole, isoxaflutole, metconazole, myclobutanil, oxadiargyl, paclobutrazol, penconazole, prochloraz, propiconazole, sulfentrazone, tebuconazole, tebufenpyrad, tetraconazole, thiabendazole, triadimefon, triadimenol, triflumizol, triticonazole, uniconazole |
| Benzamide                   | 2,6-dichlorobenzamide, flutolanil                                                                                                                                                                                                                                                                                                                                                                                                                                                                                                                                                               |
| Benzimidazole               | fuberidazole                                                                                                                                                                                                                                                                                                                                                                                                                                                                                                                                                                                    |
| Benzophenone                | metrafenone                                                                                                                                                                                                                                                                                                                                                                                                                                                                                                                                                                                     |
| Benzofuran                  | ethofumesate                                                                                                                                                                                                                                                                                                                                                                                                                                                                                                                                                                                    |
| Benzonitrile                | ioxynil                                                                                                                                                                                                                                                                                                                                                                                                                                                                                                                                                                                         |
| Butenolide                  | spiromesifen                                                                                                                                                                                                                                                                                                                                                                                                                                                                                                                                                                                    |
| Carbamate                   | 3-hidroxykarbofuran, alanykarb, aldicarb, aldicarb sulfone, aldicarb sulfoxide, aminokarb, bendiokarb, benfurakarb, bifenazate, butokarboxim, butokarboxim sulfoxide, karbaryl, karbendazim, karbetamide, karbofuran, karbosulfan,                                                                                                                                                                                                                                                                                                                                                              |

|                  |                                                                                                                                                                                                                                                                                                                                                                                                                                                                                     |
|------------------|-------------------------------------------------------------------------------------------------------------------------------------------------------------------------------------------------------------------------------------------------------------------------------------------------------------------------------------------------------------------------------------------------------------------------------------------------------------------------------------|
|                  | desmedipham, diethofencarb, dioxacarbe, EPTC, esprocarbe, ethiofencarb, ethiofencarbe sulfone, ethiofencarbe sulfoxide, fenobucarb, fenoxycarb, furathiocarb, iprovalicarb, isoprocarbe, karbutilate, methiocarb, methiocarb sulfone, methiocarbe sulfoxide, methomyl, molinate, oxamyl, oxamyl oxime, phenmedipham, pirimicarb, pirimicarb desmethyl, propamocarb, propham, propoxur, thiobencarb, thiodicarb, thiofanox, tiofanox sulfone, tiofanox sulfoxide, thiophanate-methyl |
| Carboxamide      | benalaxyl, carpropamid, chlorantraniliprole, cyflufenamid, etobenzanid, flubendiamide, mepronil, metalaxyl, metalaxyl m, mandipropamid, propyzamide, zoxamide                                                                                                                                                                                                                                                                                                                       |
| Chloroacetamide  | alachlor, butachlor, dimethenamid                                                                                                                                                                                                                                                                                                                                                                                                                                                   |
| Cyclohexanedione | clethodim cycloxydim, tepraloxym                                                                                                                                                                                                                                                                                                                                                                                                                                                    |
| Dinitroaniline   | pendimethalin                                                                                                                                                                                                                                                                                                                                                                                                                                                                       |
| Dioxoles         | piperonyl butoxide                                                                                                                                                                                                                                                                                                                                                                                                                                                                  |
| Dithiolane       | isoprothiolane                                                                                                                                                                                                                                                                                                                                                                                                                                                                      |
| Flavonoid        | rotenone                                                                                                                                                                                                                                                                                                                                                                                                                                                                            |
| Hydrazine        | halofenozide, methoxyfenozide, tebufenozide                                                                                                                                                                                                                                                                                                                                                                                                                                         |
| Imidazolinone    | imazethapyr, imazapic                                                                                                                                                                                                                                                                                                                                                                                                                                                               |
| Imine            | fluthiacet-methyl                                                                                                                                                                                                                                                                                                                                                                                                                                                                   |
| Lactone          | abamectin, doramectin, emamectin benzoate, eprinomectin, moxidectin, spinetoram, spinosad, spiroticlofen                                                                                                                                                                                                                                                                                                                                                                            |
| Morpholine       | dimethomorph, dodemorph, fenpropimorph, spiroxamine, tridemorph                                                                                                                                                                                                                                                                                                                                                                                                                     |
| Neonicotinoid    | acetamiprid, imidacloprid, thiamethoxam                                                                                                                                                                                                                                                                                                                                                                                                                                             |
| Organophosphorus | acephate, azamethiphos, azinphos-ethyl, azinphos-methyl, cadusafos, chlorpyrifos, chlorpyrifos methyl,                                                                                                                                                                                                                                                                                                                                                                              |

|              |                                                                                                                                                                                                                                                                                                                                                                                                                                                                                                                                                                                 |
|--------------|---------------------------------------------------------------------------------------------------------------------------------------------------------------------------------------------------------------------------------------------------------------------------------------------------------------------------------------------------------------------------------------------------------------------------------------------------------------------------------------------------------------------------------------------------------------------------------|
|              | chlorfenvinphos, coumaphos, demeton-s-methyl, diazinon, dichlorvos, dicrotophos, dimethoate, disulfoton, etrimfos, ethion, ethoprophos, fenamiphos, fenthion, fenthion sulfoxide, heptenophos, isocarbophos, isofenphos, isoxathion, malathion, methidathion, mephosfolan, methamidophos, mevinphos, monocrotophós, omethoate, phosphamidon, pirimiphos-ethyl, pirimiphos-methyl, phenthoate, phosalone, phosmet, phoxim, profenophos, pyrazophos, pyridaphention, quinalphos, temephos, terbufos, tolclofos-methyl, triazophos, trichlorphon, vamidothion, vamidothion sulfone |
| Organotin    | cyhexatin                                                                                                                                                                                                                                                                                                                                                                                                                                                                                                                                                                       |
| Oxadiazine   | indoxacarb                                                                                                                                                                                                                                                                                                                                                                                                                                                                                                                                                                      |
| Oxazolidine  | famoxadone, oxadixyl                                                                                                                                                                                                                                                                                                                                                                                                                                                                                                                                                            |
| Oxyacetamide | flufenacet, mefenacet                                                                                                                                                                                                                                                                                                                                                                                                                                                                                                                                                           |
| Phenyl Ether | lactofen                                                                                                                                                                                                                                                                                                                                                                                                                                                                                                                                                                        |
| Piperazine   | triforine                                                                                                                                                                                                                                                                                                                                                                                                                                                                                                                                                                       |
| Piperidine   | fenpropidin                                                                                                                                                                                                                                                                                                                                                                                                                                                                                                                                                                     |
| Propionate   | quizalofop-ethyl                                                                                                                                                                                                                                                                                                                                                                                                                                                                                                                                                                |
| Pyridazine   | pyridaben, norflurazon                                                                                                                                                                                                                                                                                                                                                                                                                                                                                                                                                          |
| Pyridine     | boscalid, flonicamid, fluazifop-p-butyl ether, nitenpyram, pyriproxyfen, pyrifenox, thiacloprid                                                                                                                                                                                                                                                                                                                                                                                                                                                                                 |
| Pyrimidine   | bupirimate, cyprodinil, ethirimol, fenarimol, mepanipirym, nuarimol, pyrimethanil                                                                                                                                                                                                                                                                                                                                                                                                                                                                                               |
| Quinazoline  | fenazaquim, proquinazid                                                                                                                                                                                                                                                                                                                                                                                                                                                                                                                                                         |
| Quinoline    | quinoxifen                                                                                                                                                                                                                                                                                                                                                                                                                                                                                                                                                                      |
| Strobilurin  | azoxystrobin, dimoxystrobin, fenamidone, fluoxastrobin, kresoxim-methyl, picoxystrobina, pyraclostrobin,                                                                                                                                                                                                                                                                                                                                                                                                                                                                        |

|                |                                                                                                                                                                                                                                                                                                                                                                                       |
|----------------|---------------------------------------------------------------------------------------------------------------------------------------------------------------------------------------------------------------------------------------------------------------------------------------------------------------------------------------------------------------------------------------|
|                | trifloxystrobin                                                                                                                                                                                                                                                                                                                                                                       |
| Sulfonamide    | flusulfamide                                                                                                                                                                                                                                                                                                                                                                          |
| Sulphite ester | propargite                                                                                                                                                                                                                                                                                                                                                                            |
| Terpene        | azadirachtin, ethofenprox                                                                                                                                                                                                                                                                                                                                                             |
| Tetrazine      | clofentezine                                                                                                                                                                                                                                                                                                                                                                          |
| Thiadiazine    | buprofezin                                                                                                                                                                                                                                                                                                                                                                            |
| Thiazole       | acibenzolar-s-methyl, hexythiazox, tricyclazole                                                                                                                                                                                                                                                                                                                                       |
| Triazine       | ametryne, atrazine, cyromazine, methoprottryne, metribuzin, prometryn, prometon, propazine, pymetrozine, sebuthylazine, simazine, simetryn, terbumeton, terbutryn                                                                                                                                                                                                                     |
| Triketone      | mesotrione                                                                                                                                                                                                                                                                                                                                                                            |
| Urea           | daimuron, diafenthiuron, diflubenzuron, diuron, chloroxuron, chlorbromuron, chlorfluazuron, chlorimuron-ethyl, cumyluron, ethidimuron, fenuron, flufenoxuron, forchlorfenuron, imazosulfuron, isoproturon, linuron, metobromuron, metoxuron, monolinuron, metsulfuron methyl, neburon, novaluron, pencycuron, siduron, tebuthiuron, teflubenzuron, triflumuron, triflusulfuron-methyl |
| Xylylalanine   | furalaxyl                                                                                                                                                                                                                                                                                                                                                                             |

<sup>1</sup> Chemical class of pesticides according to PubChem database and EURL DataPool website (<https://www.eurl-pesticides-datapool.eu>) [28].
